# Supplementary material for: A 4-Month Whole-Systems Ayurvedic Medicine Nutrition and Lifestyle Intervention Is Feasible and Acceptable for Breast Cancer Survivors: Results of a Single-Arm Pilot Clinical Trial
Source: PubMed Central journal article supplement — Glob Adv Health Med. 2020 Dec 1;9:2164956120964712. doi: 10.1177/2164956120964712 (PMC7716077; doi:10.1177/2164956120964712), 2020-12-01
Supplement: sj-pdf-1-gam-10.1177_2164956120964712.pdf [file sj-pdf-1-gam-10.1177_2164956120964712.pdf]

Supplemental Table 1: Summary of Linear Mixed Model Estimated Means and Change from Baseline for EORTC QLQ-30

| Outcome Measure          | Model Marginal Means |                     | Change from Baseline |             |                             |                      |
|--------------------------|----------------------|---------------------|----------------------|-------------|-----------------------------|----------------------|
|                          | Study Month          | Estimated Mean (SE) | p-value <sup>a</sup> | Coefficient | --95% Confidence Interval-- | p-value <sup>b</sup> |
| <i>EORTC QLQ 30</i>      |                      |                     |                      |             |                             |                      |
| <i>Global Health</i>     |                      |                     |                      |             |                             |                      |
| Global Health            | Baseline             | 64.3 (2.9)          | 0.001                | ---         |                             |                      |
|                          | Month 1              | 65.3 (3.0)          |                      | 1.0         | (-5.8; 7.8)                 | 0.78                 |
|                          | Month 2              | 67.3 (3.3)          |                      | 2.9         | (-4.3; 10.1)                | 0.42                 |
|                          | Month 3              | 68.4 (3.4)          |                      | 4.0         | (-3.3; 11.4)                | 0.28                 |
|                          | Month 4              | 78.2 (3.2)          |                      | 13.8        | (6.8; 20.8)                 | <0.001               |
| <i>Functional Scales</i> |                      |                     |                      |             |                             |                      |
| Physical Function        | Baseline             | 87.1 (2.1)          | 0.049                | ---         |                             |                      |
|                          | Month 1              | 87.5 (2.2)          |                      | 0.4         | (-4.2; 4.9)                 | 0.87                 |
|                          | Month 2              | 91.1 (2.3)          |                      | 4.0         | (-0.9; 8.8)                 | 0.11                 |
|                          | Month 3              | 93.6 (2.4)          |                      | 6.5         | (1.5; 11.5)                 | 0.011                |
|                          | Month 4              | 91.4 (2.3)          |                      | 4.3         | (-0.4; 9.0)                 | 0.074                |
| Role Functioning         | Baseline             | 80.0 (3.8)          | 0.214                | ---         |                             |                      |
|                          | Month 1              | 76.7 (4.0)          |                      | -3.2        | (-11.8; 5.3)                | 0.46                 |
|                          | Month 2              | 79.5 (4.4)          |                      | -0.4        | (-9.4; 8.6)                 | 0.93                 |
|                          | Month 3              | 84.4 (4.4)          |                      | 4.4         | (-4.9; 13.8)                | 0.35                 |
|                          | Month 4              | 86.6 (4.1)          |                      | 6.6         | (-2.2; 15.4)                | 0.14                 |
| Emotional Functioning    | Baseline             | 65.5 (2.7)          | <0.001               | ---         |                             |                      |
|                          | Month 1              | 70.7 (2.9)          |                      | 5.2         | (-0.8; 11.2)                | 0.087                |
|                          | Month 2              | 72.5 (3.1)          |                      | 7.0         | (0.6; 13.3)                 | 0.031                |
|                          | Month 3              | 76.3 (3.2)          |                      | 10.8        | (4.3; 17.3)                 | 0.001                |
|                          | Month 4              | 78.5 (3.0)          |                      | 13.0        | (6.8; 19.2)                 | <0.001               |
| Cognitive Functioning    | Baseline             | 69.1 (3.6)          | <0.0001              | ---         |                             |                      |
|                          | Month 1              | 74.5 (3.7)          |                      | 5.4         | (-0.01; 10.9)               | 0.051                |
|                          | Month 2              | 80.4 (3.8)          |                      | 11.3        | (5.5; 17.1)                 | <0.001               |
|                          | Month 3              | 78.8 (3.9)          |                      | 9.7         | (3.7; 15.6)                 | 0.002                |
|                          | Month 4              | 82.0 (3.7)          |                      | 12.9        | (7.2; 18.6)                 | <0.001               |
| Social Functioning       | Baseline             | 75.0 (3.7)          | 0.011                | ---         |                             |                      |
|                          | Month 1              | 74.8 (3.9)          |                      | -0.2        | (-9.0; 8.7)                 | 0.97                 |
|                          | Month 2              | 80.0 (4.2)          |                      | 4.7         | (-4.7; 14.1)                | 0.33                 |
|                          | Month 3              | 85.4 (4.4)          |                      | 10.4        | (0.6; 20.2)                 | 0.038                |
|                          | Month 4              | 88.5 (4.1)          |                      | 13.5        | (4.4; 22.7)                 | 0.004                |
| <i>Symptom Scales</i>    |                      |                     |                      |             |                             |                      |
| Fatigue                  | Baseline             | 37.6 (3.3)          | 0.003                | ---         |                             |                      |
|                          | Month 1              | 34.6 (3.5)          |                      | -3.0        | (-9.9; 3.9)                 | 0.40                 |
|                          | Month 2              | 27.4 (3.7)          |                      | -10.2       | (-17.6; -2.9)               | 0.007                |
|                          | Month 3              | 27.1 (3.8)          |                      | -10.5       | (-18.0; -2.0)               | 0.007                |
|                          | Month 4              | 25.6 (3.6)          |                      | -12.1       | (-19.2; -4.9)               | 0.001                |

|                        |          |            |       |       |               |       |
|------------------------|----------|------------|-------|-------|---------------|-------|
| Nausea and vomiting    | Baseline | 7.5 (2.1)  | 0.445 | ---   |               |       |
|                        | Month 1  | 3.6 (2.2)  |       | -3.9  | (-8.0; 0.2)   | 0.065 |
|                        | Month 2  | 5.5 (2.3)  |       | -2.0  | (-6.3; 2.4)   | 0.38  |
|                        | Month 3  | 5.7 (2.4)  |       | -1.8  | (-6.3; 2.7)   | 0.44  |
|                        | Month 4  | 6.6 (2.3)  |       | -0.9  | (-5.2; 3.4)   | 0.68  |
| Pain                   | Baseline | 21.5 (3.6) | 0.335 | ---   |               |       |
|                        | Month 1  | 22.8 (3.7) |       | 1.3   | (-6.7; 9.3)   | 0.76  |
|                        | Month 2  | 22.5 (4.0) |       | 0.9   | (-7.6; 9.4)   | 0.83  |
|                        | Month 3  | 18.9 (4.1) |       | -2.7  | (-11.4; 6.1)  | 0.55  |
|                        | Month 4  | 14.8 (3.9) |       | -6.7  | (-15.0; 1.6)  | 0.11  |
| Dyspnea                | Baseline | 14.1 (2.8) | 0.110 | ---   |               |       |
|                        | Month 1  | 12.3 (2.9) |       | -1.7  | (-8.8; 5.3)   | 0.63  |
|                        | Month 2  | 6.2 (3.2)  |       | -7.9  | (-15.4; -0.4) | 0.040 |
|                        | Month 3  | 5.7 (3.3)  |       | -8.3  | (-16.0; -0.6) | 0.034 |
|                        | Month 4  | 8.0 (3.1)  |       | -6.0  | (-13.3; 1.3)  | 0.11  |
| Insomnia               | Baseline | 43.7 (4.1) | 0.059 | ---   |               |       |
|                        | Month 1  | 34.5 (4.3) |       | -9.2  | (-18.2; -0.2) | 0.046 |
|                        | Month 2  | 35.9 (4.6) |       | -7.8  | (-17.5; 1.8)  | 0.11  |
|                        | Month 3  | 35.2 (4.8) |       | -8.5  | (-18.5; 1.4)  | 0.093 |
|                        | Month 4  | 29.7 (4.5) |       | -14.1 | (-23.5; -4.6) | 0.003 |
| Appetite Loss          | Baseline | 9.5 (3.2)  | 0.716 | ---   |               |       |
|                        | Month 1  | 7.6 (3.4)  |       | -2.0  | (-8.4; 4.4)   | 0.55  |
|                        | Month 2  | 6.8 (3.6)  |       | -2.7  | (-9.5; 4.1)   | 0.43  |
|                        | Month 3  | 4.5 (3.7)  |       | -5.1  | (-12.1; 1.9)  | 0.16  |
|                        | Month 4  | 7.8 (3.5)  |       | -1.8  | (-8.4; 4.9)   | 0.60  |
| Constipation           | Baseline | 15.6 (3.3) | 0.334 | ---   |               |       |
|                        | Month 1  | 17.8 (3.5) |       | 2.2   | (-5.6; 10.0)  | 0.58  |
|                        | Month 2  | 10.3 (3.8) |       | -5.3  | (-13.6; 3.0)  | 0.21  |
|                        | Month 3  | 10.9 (3.9) |       | -4.8  | (-13.3; 3.8)  | 0.27  |
|                        | Month 4  | 12.3 (3.7) |       | -3.3  | (-11.4; 4.8)  | 0.43  |
| Diarrhea               | Baseline | 7.6 (2.4)  | 0.683 | ---   |               |       |
|                        | Month 1  | 4.6 (2.5)  |       | -3.1  | (-9.7; 3.6)   | 0.37  |
|                        | Month 2  | 8.3 (2.7)  |       | 0.6   | (-6.3; 7.6)   | 0.86  |
|                        | Month 3  | 6.0 (2.8)  |       | -1.7  | (-8.9; 5.5)   | 0.64  |
|                        | Month 4  | 3.8 (2.6)  |       | -3.9  | (-10.7; 3.0)  | 0.27  |
| Financial Difficulties | Baseline | 31.8 (5.7) | 0.224 | ---   |               |       |
|                        | Month 1  | 30.8 (5.9) |       | -0.9  | (-10.9; 9.0)  | 0.85  |
|                        | Month 2  | 23.7 (6.2) |       | -8.1  | (-18.7; 2.5)  | 0.14  |
|                        | Month 3  | 36.5 (6.3) |       | 4.8   | (-6.2; 15.7)  | 0.39  |
|                        | Month 4  | 27.0 (6.1) |       | -4.8  | (-15.2; 5.6)  | 0.36  |

<sup>a</sup> Overall test p-value is the model p-value for these models, which has month as the predictor and is the global test of whether the outcome changes over time

<sup>b</sup> p-value for intercept (baseline) tested intercept = 0 (p<0.05), evidence that average of measure at baseline was not =0. p-value of coefficients for month 1-4 tested change from baseline =0 (SE) standard error
