# Supplementary material for: A 4-Month Whole-Systems Ayurvedic Medicine Nutrition and Lifestyle Intervention Is Feasible and Acceptable for Breast Cancer Survivors: Results of a Single-Arm Pilot Clinical Trial
Source: PubMed Central journal article supplement — Glob Adv Health Med. 2020 Dec 1;9:2164956120964712. doi: 10.1177/2164956120964712 (PMC7716077; doi:10.1177/2164956120964712), 2020-12-01
Supplement: sj-pdf-2-gam-10.1177_2164956120964712.pdf [file sj-pdf-2-gam-10.1177_2164956120964712.pdf]

Supplemental Table 2: Summary of Linear Mixed Model Estimated Means and Change from Baseline for BR23

| Outcome Measure               | Model Marginal Means |                     | Change from Baseline |             |                             |                      |
|-------------------------------|----------------------|---------------------|----------------------|-------------|-----------------------------|----------------------|
|                               | Study Month          | Estimated Mean (SE) | p-value <sup>a</sup> | Coefficient | --95% Confidence Interval-- | p-value <sup>b</sup> |
| <i>BR23</i>                   |                      |                     |                      |             |                             |                      |
| Body Image                    | Baseline             | 67.6 (4.2)          | 0.039                | ---         |                             |                      |
|                               | Month 1              | 72.3 (4.3)          |                      | 4.7         | (-2.7; 12.1)                | 0.21                 |
|                               | Month 2              | 75.7 (4.5)          |                      | 8.1         | (0.2; 16.1)                 | 0.044                |
|                               | Month 3              | 76.6 (4.6)          |                      | 9.0         | (0.9; 17.2)                 | 0.030                |
|                               | Month 4              | 79.1 (4.4)          |                      | 11.5        | (3.8; 19.2)                 | 0.004                |
| Sexual Functioning            | Baseline             | 25.8 (3.6)          | 0.99                 | ---         |                             |                      |
|                               | Month 1              | 25.1 (3.7)          |                      | -0.6        | (-7.5; 6.2)                 | 0.86                 |
|                               | Month 2              | 26.0 (4.0)          |                      | 0.2         | (-7.0; 7.5)                 | 0.95                 |
|                               | Month 3              | 27.5 (4.0)          |                      | 1.7         | (-5.8; 9.2)                 | 0.66                 |
|                               | Month 4              | 26.1 (3.8)          |                      | 0.3         | (-6.8; 7.4)                 | 0.94                 |
| Sexual Enjoyment              | Baseline             | 51.5 (6.6)          | 0.011                | ---         |                             |                      |
|                               | Month 1              | 44.6 (6.7)          |                      | -6.9        | (-17.8; 4.1)                | 0.22                 |
|                               | Month 2              | 57.1 (6.7)          |                      | 5.6         | (-6.2; 17.4)                | 0.35                 |
|                               | Month 3              | 50.0 (7.2)          |                      | -1.5        | (-14.1; 11.0)               | 0.81                 |
|                               | Month 4              | 65.0 (7.4)          |                      | 13.5        | (0.5; 26.6)                 | 0.043                |
| Future Perspective            | Baseline             | 49.0 (3.9)          | 0.044                | ---         |                             |                      |
|                               | Month 1              | 59.1 (4.1)          |                      | 10.1        | (1.6; 18.7)                 | 0.020                |
|                               | Month 2              | 54.7 (4.4)          |                      | 5.8         | (-3.3; 14.9)                | 0.21                 |
|                               | Month 3              | 53.4 (4.5)          |                      | 4.4         | (-4.9; 13.8)                | 0.35                 |
|                               | Month 4              | 61.7 (4.2)          |                      | 12.7        | (3.9; 21.6)                 | 0.005                |
| Systemic therapy side effects | Baseline             | 15.4 (1.9)          | 0.35                 | ---         |                             |                      |
|                               | Month 1              | 12.7 (2.0)          |                      | -2.8        | (-6.7; 1.2)                 | 0.17                 |
|                               | Month 2              | 13.0 (2.1)          |                      | -2.5        | (-6.6; 1.7)                 | 0.24                 |
|                               | Month 3              | 14.1 (2.2)          |                      | -1.4        | (-5.6; 2.9)                 | 0.53                 |
|                               | Month 4              | 11.4 (2.0)          |                      | -4.0        | (-8.1; 0.01)                | 0.050                |

|                      |          |             |       |         |               |       |
|----------------------|----------|-------------|-------|---------|---------------|-------|
| Breast Symptoms      | Baseline | 20.7 (3.3)  | 0.71  | ---     |               |       |
|                      | Month 1  | 20.9 (3.4)  |       | 0.2     | (-6.5; 6.9)   | 0.95  |
|                      | Month 2  | 21.4 (3.6)  |       | 0.7     | (-6.5; 7.8)   | 0.86  |
|                      | Month 3  | 16.4 (3.7)  |       | -4.3    | (-11.6; 3.1)  | 0.26  |
|                      | Month 4  | 19.0 (3.5)  |       | -1.7    | (-8.7; 5.3)   | 0.63  |
| Arm Symptoms         | Baseline | 20.5 (2.8)  | 0.092 | ---     |               |       |
|                      | Month 1  | 17.3 (3.0)  |       | -3.2    | (-9.3; 3.0)   | 0.31  |
|                      | Month 2  | 16.6 (3.2)  |       | -3.9    | (-10.4; 2.6)  | 0.24  |
|                      | Month 3  | 13.4 (3.3)  |       | -7.0    | (-13.8; -0.3) | 0.039 |
|                      | Month 4  | 12.2 (3.1)  |       | -8.3    | (-14.7; -2.0) | 0.010 |
| Upset by Hair Loss * | Baseline | 33.3 (31.6) | 0.19  | ---     |               |       |
|                      | Month 1  | 0.0 (25.7)  |       | -33.3   | (-105; 38.2)  | 0.36  |
|                      | Month 2  | 50.0 (15.8) |       | 16.7    | (-52.6; 86.0) | 0.64  |
|                      | Month 3  | 33.3 (22.4) |       | <0.0001 | (-75.9; 75.9) | 1.00  |
|                      | Month 4  | 16.7 (22.4) |       | -16.7   | (-92.6; 59.2) | 0.67  |

<sup>a</sup> Overall test p-value is the model p-value for these models, which has month as the predictor and is the global test of whether the outcome changes over time

<sup>b</sup> p-value for intercept (baseline) tested intercept = 0 ( $p < 0.05$ ), evidence that average of measure at baseline was not =0. p-value of coefficients for month 1-4 tested change from baseline =0 (SE) standard error

\* skip pattern survey item with only limited responses
