# Supplementary material for: A 4-Month Whole-Systems Ayurvedic Medicine Nutrition and Lifestyle Intervention Is Feasible and Acceptable for Breast Cancer Survivors: Results of a Single-Arm Pilot Clinical Trial
Source: PubMed Central journal article supplement — Glob Adv Health Med. 2020 Dec 1;9:2164956120964712. doi: 10.1177/2164956120964712 (PMC7716077; doi:10.1177/2164956120964712), 2020-12-01
Supplement: sj-pdf-3-gam-10.1177_2164956120964712.pdf [file sj-pdf-3-gam-10.1177_2164956120964712.pdf]

Supplemental Table 3: Summary of Linear Mixed Model Estimated Means and Change from Baseline for Symptoms

|                                  | Model Marginal Means |                     | Change from Baseline |             |                             |                      |
|----------------------------------|----------------------|---------------------|----------------------|-------------|-----------------------------|----------------------|
|                                  | Study Month          | Estimated Mean (SE) | p-value <sup>a</sup> | Coefficient | --95% Confidence Interval-- | p-value <sup>b</sup> |
| <i>GSDS</i> Sleep Disturbance    |                      |                     |                      |             |                             |                      |
| GSDS Total                       | Baseline             | 61.9(3.6)           | <0.001               | ---         |                             |                      |
|                                  | Month 2              | 46.6 (3.6)          |                      | -15.3       | (-22.5; -8.2)               | <0.001               |
|                                  | Month 4              | 41.3 (3.4)          |                      | -20.7       | (27.4; 8.2)                 | <0.001               |
| Quality of Sleep                 | Baseline             | 13.2 (0.9)          | <0.001               | ---         |                             |                      |
|                                  | Month 2              | 10.5 (1.0)          |                      | -2.7        | (-4.6; -0.8)                | 0.006                |
|                                  | Month 4              | 7.9 (0.9)           |                      | -5.3        | (-7.1; -3.4)                | <0.001               |
| Quantity of Sleep                | Baseline             | 4.8 (0.4)           | <0.001               | --          |                             |                      |
|                                  | Month 2              | 3.9 (0.4)           |                      | -0.9        | (-1.8; 0.0)                 | 0.049                |
|                                  | Month 4              | 3.1 (0.4)           |                      | -1.8        | (-2.7; -0.9)                | <0.001               |
| Sleep Onset Latency              | Baseline             | 3.4 (0.3)           | <0.001               |             |                             |                      |
|                                  | Month 2              | 2.6 (0.4)           |                      | -0.8        | (-1.6; -0.04)               | 0.040                |
|                                  | Month 4              | 1.2 (0.4)           |                      | -2.2        | (-3.0; -1.5)                | <0.001               |
| Mid Sleep Wakes                  | Baseline             | 5.8 (0.3)           | <0.001               |             |                             |                      |
|                                  | Month 2              | 4.9 (0.4)           |                      | -1.0        | (-1.8; -0.2)                | 0.022                |
|                                  | Month 4              | 3.7 (0.4)           |                      | -2.2        | (-3.0; -1.4)                | <0.001               |
| Early Awakenings                 | Baseline             | 4.9 (0.4)           | <0.001               |             |                             |                      |
|                                  | Month 2              | 3.2 (0.4)           |                      | -1.7        | (-2.6; -0.7)                | <0.001               |
|                                  | Month 4              | 2.7 (0.4)           |                      | -2.2        | (-3.1; -1.3)                | <0.001               |
| Medications for Sleep            | Baseline             | 12.0 (1.9)          | 0.12                 | --          |                             |                      |
|                                  | Month 2              | 10.4 (1.9)          |                      | -1.7        | (-4.9; 1.5)                 | 0.30                 |
|                                  | Month 4              | 8.8 (1.9)           |                      | -3.2        | (-6.2; -0.2)                | 0.039                |
| Excessive Daytime Sleepiness     | Baseline             | 19.5 (1.5)          | <0.001               | --          |                             |                      |
|                                  | Month 2              | 12.8 (1.5)          |                      | -6.7        | (-10; -3.5)                 | <0.001               |
|                                  | Month 4              | 12.1 (1.5)          |                      | -7.3        | (-10.4; -4.3)               | <0.001               |
| <i>LFS</i> Energy                | Baseline             | 4.4 (0.3)           | <0.001               | ---         |                             |                      |
|                                  | Month 2              | 4.0 (0.4)           |                      | -0.4        | (-1.2; 0.4)                 | 0.32                 |
|                                  | Month 4              | 5.7 (0.4)           |                      | 1.3         | (0.5; 2.1)                  | 0.001                |
| <i>LFS</i> Fatigue               | Baseline             |                     | <0.001               | ---         |                             |                      |
|                                  | Month 2              | 3.4 (0.5)           |                      | -0.5        | (-1.4; 0.3)                 | 0.22                 |
|                                  | Month 4              | 2.2 (0.5)           |                      | -1.7        | (2.5; -0.9)                 | <0.001               |
| <i>CES-D</i> Depressive Symptoms | Baseline             | 15.8 (1.4)          | <0.001               | ---         |                             |                      |
|                                  | Month 2              | 8.7 (1.4)           |                      | -7.1        | (-9.9; -4.3)                | <0.001               |
|                                  | Month 4              | 6.6 (1.4)           |                      | -9.2        | (-12.0; -6.4)               | <0.001               |

|                                   |          |            |        |      |               |        |
|-----------------------------------|----------|------------|--------|------|---------------|--------|
| <i>STA/ State Anxiety</i>         | Baseline | 36.5 (1.9) | <0.001 | ---  |               |        |
|                                   | Month 2  | 34.1 (2.0) |        | -2.4 | (-6.2; 1.4)   | 0.21   |
|                                   | Month 4  | 29.2 (2.0) |        | -7.3 | (-10.9; -3.6) | <0.001 |
| <i>PSS Stress</i>                 | Baseline | 16.5 (1.4) | <0.001 | ---  |               |        |
|                                   | Month 2  | 11.1 (1.4) |        | -5.4 | (-8.3; -2.5)  | <0.001 |
|                                   | Month 4  | 10.4 (1.4) |        | -6.1 | (-9.0; -3.2)  | <0.001 |
| <i>FACIT Spiritual Well-Being</i> |          |            |        |      |               |        |
| Meaning                           | Baseline | 13.0 (0.5) | 0.005  | ---  |               |        |
|                                   | Month 4  | 14.6 (0.5) |        | 1.7  | (0.5; 2.9)    | 0.005  |
| Peace                             | Baseline | 9.8 (0.6)  | <0.001 | ---  |               |        |
|                                   | Month 4  | 12.1 (0.7) |        | 2.3  | (1.3; 3.3)    | <0.001 |
| Faith                             | Baseline | 9.0 (0.9)  | 0.086  | ---  |               |        |
|                                   | Month 4  | 10.7 (1.0) |        | 1.7  | (-0.2; 3.7)   | 0.086  |

<sup>a</sup> Overall test p-value equals the model p-value for these models which has month as the predictor and is the global test of whether the outcome changes over time

<sup>b</sup> p-value for intercept (baseline) tested intercept = 0 ( $p < 0.05$ ), evidence that average of measure at baseline was not =0. P-value of coefficients for month 1-4 tested change from baseline =0
